# Supplementary material for: An unprecedented intramolecular coupling of o-carboranyl and cyclopentadienyl. Synthesis and structural characterization of a ruthenium complex containing a novel doubly-bridged cyclopentadienyl-carboranyl ligand
Source: Royal Society of Chemistry journal article supplement (doi:10.1039/b409772f), 2004-01-01
Supplement: b409772f.doc [file b409772f.doc]

**This journal is ©The Royal Society of Chemistry 2004**

**Electronic Supplementary Information for *Chemical Communications* b409772f.**

**1**0.5THF: A 1.60 M solution of *n*-BuLi in *n*-hexane (1.25 mL, 2.00 mmol) was slowly added to a THF solution (15 mL) of Me2C(C5H5)(C2B10H11) (0.25 g, 1.00 mmol) at -78°C with stirring, the mixture was warmed to room temperature and stirred overnight. The powder of RuCl2(PPh3)3 (0.96 g, 1.00 mmol) was added to the resulting solution, and the mixture was stirred at room temperature for 24 h. After removal of the solvent and addition of CH2Cl2 (20 mL), the precipitate was filtered off, and the solvent was removed under vacuum. The resulting red solid was recrystallized from a THF solution to give **1**0.5THF as yellow crystals (0.73 g, 80%). 1H NMR (C6D6, 300 MHz): ** 7.60 - 7.54 (m, 6H, aryl *H*), 7.49 - 7.44 (m, 6H, aryl *H*), 6.89 - 6.81 (m, 18H, aryl *H*), 4.83 (m, 1H, C5*H*3), 3.70 (s, 1H, C5*H*3), 3.65 (s, 1H, C5*H*3), 3.58 (m, 2H, THF), 1.42 (m, 2H, THF), 1.22 (s, 6H, C*H*3), -10.86 (dd, *J*HP = 39.3 and 31.2 Hz, Ru-*H*); 13C NMR (C6D6, 75 MHz): ** 140.6 (d, 1*J*CP = 40.0 Hz, aryl *C*), 140.0 (d, 1*J*CP = 40.0 Hz, aryl *C*), 134.4 (d, 2*J*CP = 10.8 Hz, aryl *C*), 134.2 (d, 2*J*CP = 10.8 Hz, aryl *C*), 128.5 (d, 3*J*CP = 6.5 Hz, aryl *C*), 128.4 (d, 3*J*CP = 6.5 Hz, aryl *C*), 127.4 (d, 4*J*CP = 3.6 Hz, aryl *C*), 127.3 (d, 4*J*CP = 3.6 Hz, aryl *C*), 98.9, 89.9, 82.8, 82.1, 75.8 (*C*5H3), 67.8 (THF), 42.2 (*C*(CH3)2), 36.2 (*C*H3), 30.0 (*C*H3), 25.8 (THF); 31P NMR (C6D6, 162 MHz): ** 71.9, 65.2; 11B NMR (C6D6, 128 MHz): ** -5.4 (2B), -7.7 (4B), -10.1 (2B), -14.1 (2B); IR (KBr):  = 2568vs (B-H), 1970s (Ru-H) cm-1. Anal. Calcd for C46H50B10P2Ru (**1**): C, 63.21; H, 5.77. Found: 63.00; H, 5.80%; HR-FABMS: *m/z* calcd for C46H50B10P2Ru: 874.3429; found 874.3418. This complex was also prepared in 70 – 80% isolated yield from the reaction of **2** with one equivalent of MeLi or KH in THF.

**2**1.5CH2Cl2: To a suspension of NaH (85.0 mg, 3.55 mmol) in THF (10 mL) was slowly added a THF solution (10 mL) of Me2C(C5H5)(C2B10H11) (0.25 g, 1.00 mmol), and the mixture was stirred at room temperature for 12 h. After removal of excess amounts of NaH, the resulting clear solution was slowly added to a solution of RuCl2(PPh3)3 (0.96 g, 1.00 mmol) in THF (15 mL) at room temperature. The reaction mixture was then stirred for another 24 h at room temperature. The precipitate was filtered off, and the solvent was removed under vacuum. The resulting solid was recrystallized from a CH2Cl2 solution to give **2**1.5CH2Cl2 as red crystals (0.82 g, 79 %). 1H NMR (C6D6, 300 MHz): ** 7.58 - 7.52 (m, 12H, aryl *H*), 6.97 - 6.86 (m, 18H, aryl *H*), 4.27 (s, 3H, CH2Cl2), 3.62 (s, 2H, C5*H*4), 3.44 (s, 2H, C5*H*4), 2.92 (s, 1H, cage C*H*), 1.79 (s, 6H, C*H*3); 13C NMR (C6D6, 75 MHz): ** 139.1 (d, *J*CP = 20.0 Hz, aryl *C*), 138.9 (d, *J*CP = 20.0 Hz, aryl *C*), 134.6, 129.1, 128.4, 127.5, 122.7 (aryl *C*), 87.1, 76.6, 75.1 (*C*5H4), 62.9 (*C* of cage), 53.3 (*C*H2Cl2), 42.6 (*C*(CH3)2), 27.9 (*C*H3); 31P NMR (C6D6, 162 MHz): ** 37.7; 11B NMR (C6D6, 128 MHz): ** -3.2 (2B), -8.7 (4B), -10.9 (2B), -13.3 (2B); IR (KBr):  = 2582vs (B-H) cm-1; Anal. Calcd for C46H51B10ClP2Ru (**2**): C, 60.68; H, 5.65. Found: C, 60.33; H, 5.49%.
